# Supplementary material for: Prognosis Stratification Tools in Early-Stage Endometrial Cancer: Could We Improve Their Accuracy?
Source: Research Square preprint supplement (doi:10.21203/rs.3.rs-682631/v1), 2021-07-19
Supplement: Supplementary file 1 [file 19c402499ea6ddf33371487f.docx]

| **Supplementary Table 4. Univariate biomarker analysis in low-grade cohort** | | | | | |
| --- | --- | --- | --- | --- | --- |
| Variable | Descriptive | RFS | | OS | |
|  | n (%) | HR (95%CI) | p-value | HR (95%CI) | p-value |
| ER  Negative  Positive  NE | 3 (1.3)  225 (95.7)  1 (3) | 0.72 (0.10 – 5.24) | 0.75 | 0.53 (0.07 – 3.91) | 0.53 |
| PR  Negative  Positive  NE | 11 (4.7)  213 (90.6)  11 (4.7) | 2.9 (0.40 – 21.03) | 0.29 | 2.14 (0.29 – 15.65) | 0.45 |
| ECAD  Negative  Positive  NE | 27 (11.5)  202 (86)  6 (2.5) | 0.47 (0.20 – 1.13) | 0.09 | 0.59 (0.27 – 1.32) | 0.20 |
| HER2  Negative  Positive  NE | 235 (100)  0 | NE | NE | NE | NE |
| ARID1A  Negative  Positive  NE | 176 (74.9)  49 (20.8)  10 (4.3) | 0.73 (0.37 – 1.47) | 0.39 | 0.80 (0.36 – 1.72) | 0.56 |
| PTEN  Negative  Positive  NE | 158 (67.2)  73 (31.1)  4 (1.7) | 1.71 (0.99 – 2.94) | 0.05 | 1.79 (0.96 – 3.34) | 0.07 |
| L1CAM  Negative  Positive  NE | 220 (93.6)  6 (2.6)  9 (3.8) | NE | NE | NE | NE |
| *CTNNB1*  Non mutated  Mutated  NE | 204 (86.8)  17 (7.2)  14 (6) | 1.93 (0.87 – 4.29) | 0.10 | 1.20 (0.42 – 3.38) | 0.72 |
| NE: Not evaluable; HR: Hazard ratio; 95%CI: 95% Confidence interval; RFS: Relapse-free survival; OS: Overall survival. | | | | | |
